# Supplementary material
Source: PubMed Central journal article supplement (PMC3024779)
Supplement: supp_M110.186064_Cl-TnaT_rev2-supp.pdf [file supp_M110.186064_Cl-TnaT_rev2-supp.pdf]

## Supplemental Data

**Figure S1.** *Surface expression of SERT mutants.* HeLa cells expressing SERT mutant proteins were biotinylated and SERTs were isolated with immobilized streptavidin and analyzed with SDS-PAGE. Surface expression of mutants at positions S336, Y121, C369 and Q332 was detected by Western Blotting using an antibody against FLAG tag. Molecular weight bands (~ 150 KDa) corresponding to mature (glycosylated) SERT were used for comparing SERT expression levels. The representative experiment illustrated here was performed three times with similar results. NT = not transfected.

**Figure S2.** *Expression of TnaT mutant proteins.* Membranes from CY15212 expressing TnaT mutants were prepared (as described under Materials and Methods) and subjected to SDS-PAGE. Expression of TnaT was detected by Western Blotting using an antibody against the N-terminal His tag. This representative experiment was performed three times with similar results.

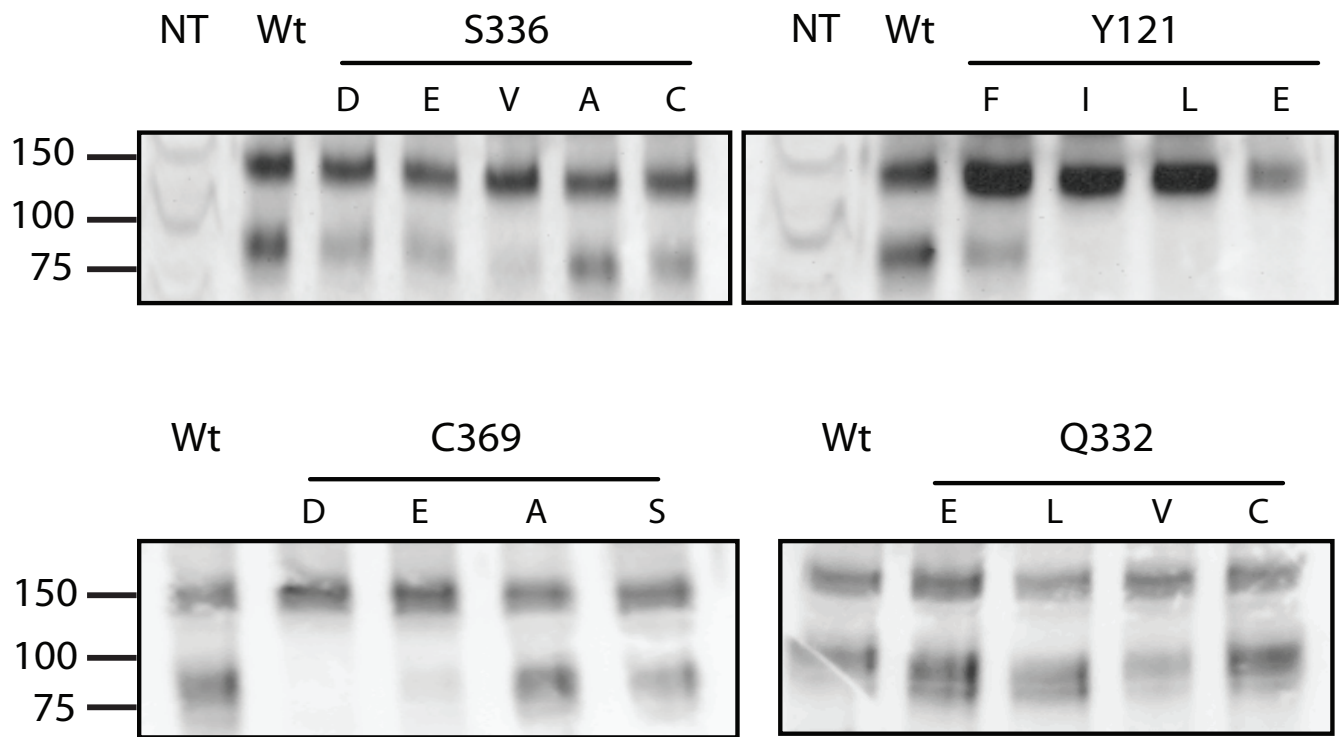

**Figure S1.** Surface expression of SERT mutants. HeLa cells expressing SERT mutant proteins were biotinylated and SERTs were isolated with immobilized streptavidin and analyzed with SDS-PAGE. Surface expression of mutants at positions S336, Y121, C369 and Q332 was detected by Western Blotting using an antibody against FLAG tag. Molecular weight bands (~ 150 KDa) corresponding to mature (glycosylated) SERT were used for comparing SERT expression levels. The representative experiment illustrated here was performed three times with similar results. NT = not transfected.

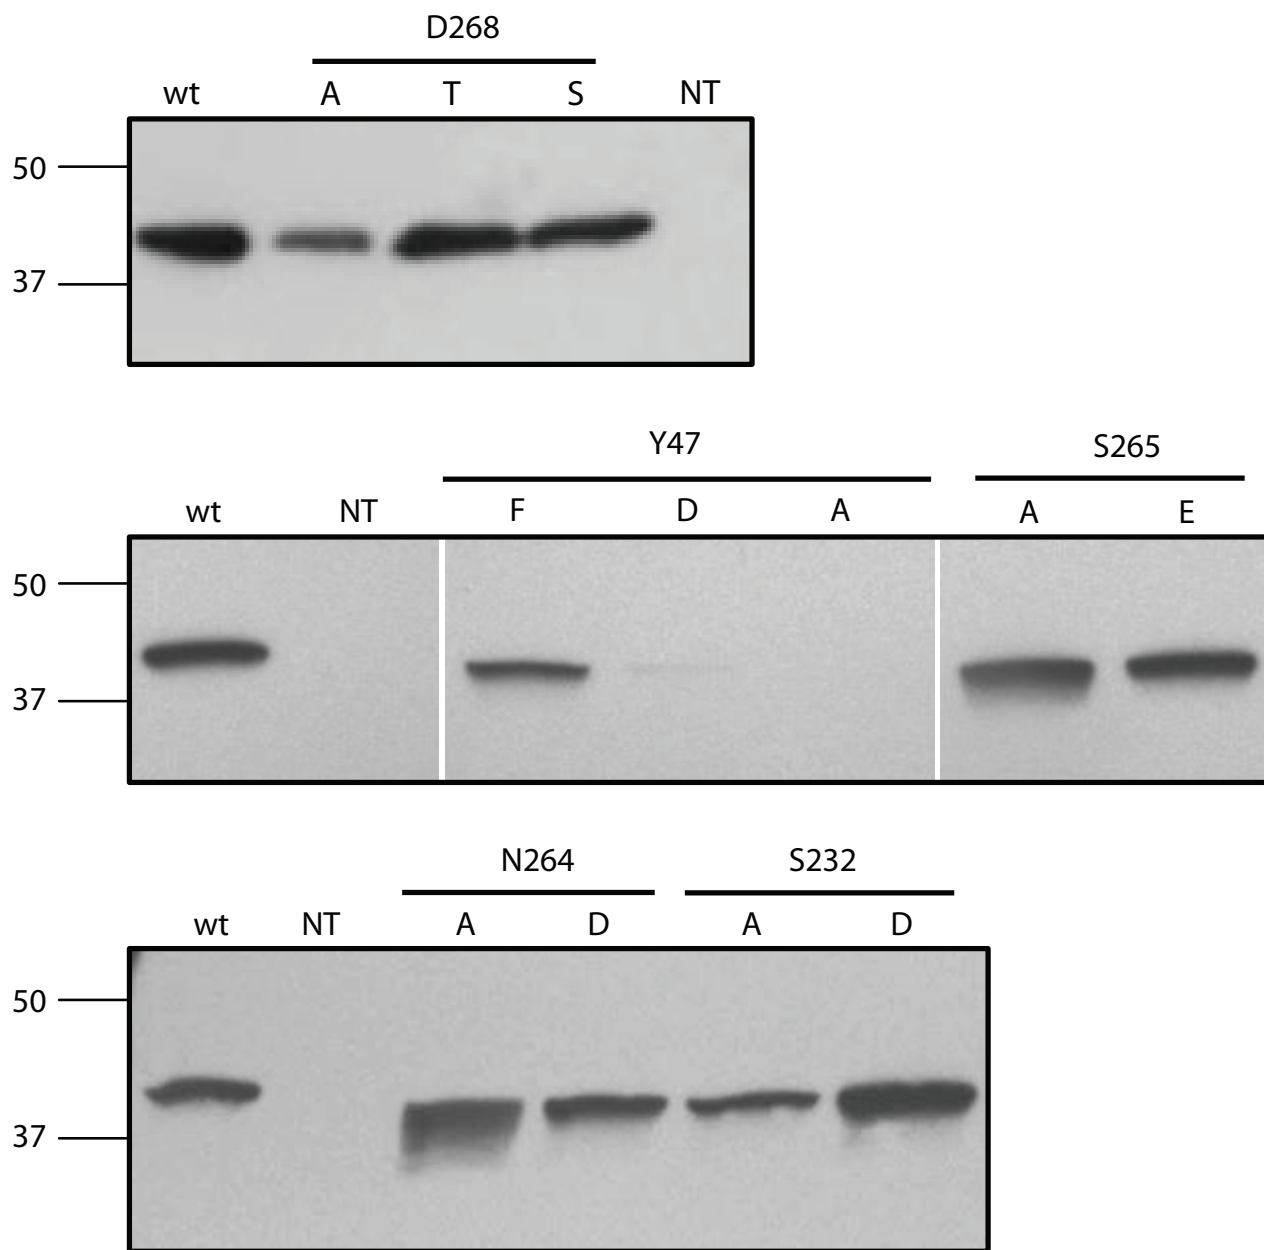

**Figure S2.** Expression of TnaT mutant proteins. Membranes from CY15212 expressing TnaT mutants were prepared (as described under Materials and Methods) and subjected to SDS-PAGE. Expression of TnaT was detected by Western Blotting using an antibody against the N-terminal His tag. This representative experiment was performed three times with similar results.
